# Supplementary material
Source: MDPI journal article supplement (https://www.mdpi.com/1999-4907/9/9/540)
Supplement: s1 [file s1]

## Supplementary material

Table S1. Depth of edge influence (m) of the selected linear openings into the adjacent forest determined based on the slope of the CUSUM curve

| <i>Comparison</i>                              | <i>Type</i>         | <i>Gap fraction</i> | <i>Sap. height</i> | <i>Sap. density</i> | <i>Tree height</i> | <i>Tree Density</i> | <i>Range of depth</i> |
|------------------------------------------------|---------------------|---------------------|--------------------|---------------------|--------------------|---------------------|-----------------------|
| <i>Natural vs Anthropogenic</i>                | <i>Natural</i>      | 75                  | 55                 | 35                  | 50                 | 24                  | 24-75                 |
|                                                | <i>Anthropo.</i>    | 45                  | 52                 | 54                  | 18                 | 48                  | 18-54                 |
| <i>Linear openings (in increasing width)</i>   | <i>Road</i>         | 15                  | 28                 | 47                  | 44                 | 45                  | 15-47                 |
|                                                | <i>Stream</i>       | 75                  | 55                 | 35                  | 50                 | 24                  | 24-75                 |
|                                                | <i>Powerline</i>    | 43                  | 38                 | 60                  | 20                 | 54                  | 20-60                 |
| <i>Natural vs Anthropogenic vs orientation</i> | <i>Natural-E</i>    | 45                  | 44                 | 22                  | 44                 | 56                  | 22-56                 |
|                                                | <i>Natural-W</i>    | 60                  | 60                 | 38                  | 45                 | 44                  | 38-60                 |
|                                                | <i>Anthropo.-E</i>  | 58                  | 25                 | 63                  | 28                 | 25                  | 25-63                 |
|                                                | <i>Anthropo.-W</i>  | 80                  | 54                 | 75                  | 55                 | 50                  | 50-80                 |
|                                                | <i>Anthropo.-N</i>  | 25                  | 52                 | 38                  | 28                 | 34                  | 25-38                 |
|                                                | <i>Anthropo.-S</i>  | 18                  | 54                 | 24                  | 25                 | 34                  | 18-54                 |
|                                                | <b><i>Range</i></b> | <i>15-80</i>        | <i>38-60</i>       | <i>22-75</i>        | <i>18-55</i>       | <i>24-56</i>        |                       |

*Anthropo.* : Anthropogenic openings; *E*: East; *W*: West; *N*: North; *S*:South; *Ref*: Reference forest

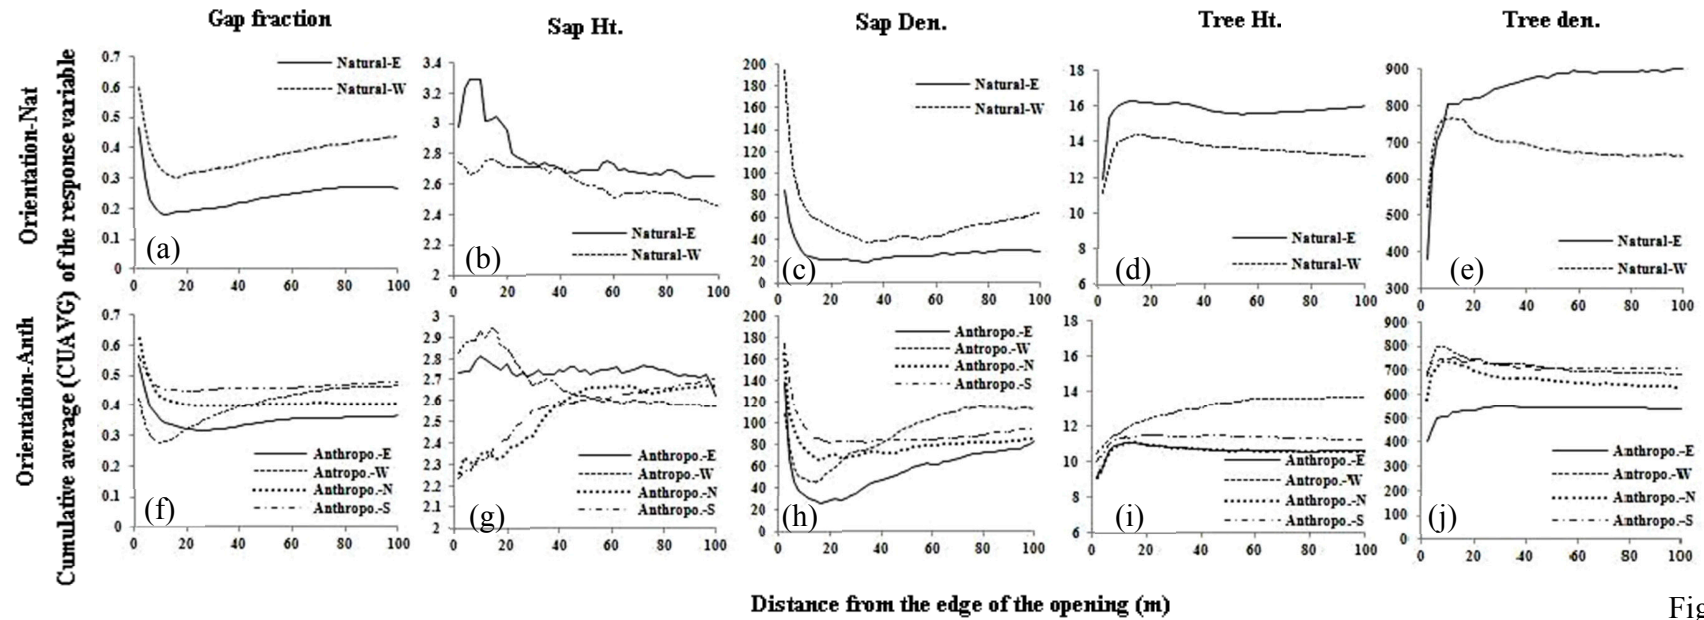

Anth. Or Anthropo. : Anthropogenic openings; E: East; W: West; N: North; S: South

Fig

Figure S1. Depth of influence (DEI) of selected types of linear openings on either sides of the adjoining forest shown by CUAVG curves of response variables against the distance from the edge of a linear opening. (a)-(e) DEI on either sides of natural linear openings; (f)-(j) DEI on either sides of anthropogenic linear openings
